# Supplementary material
Source: Elsevier journal article supplement (https://www.sciencedirect.com/science/article/pii/S0025775321007168)
Supplement: mmc1 [file S0025775321007168:mmc1.docx]

**Appendix 1. Questionnaire regarding Behçet Disease and Covid-19.**

**General Data**

- Gender (Female/Male)
- Age (years)
- Disease Behcet diagnosis date (year)
- Weight (kg)
- Height (m)

**Co-morbidities**

Please indicate Yes/No for the following co-morbidities:

- Hypertension
- Ischemic heart disease
- Chronic kidney disease
- Stroke
- Diabetes Mellitus
- Chronic obstructive pulmonary disease (COPD)

**Long-term medications**

- Do you have a long-term use of Colchicine (more than thirty days)? (Yes/No)
- If your previous answer has been yes, what dose do you take? (mg/day)
- Do you have a long-term use of oral glucocorticoids (more than thirty days)?
- Do you have a long-term use oftTumor necrosis factor inhibitors (Anti-TNF drugs) (more than thirty days)?

**Coronavirus disease 2019 (COVID-19)**

- Have you had a COVID-19 infection? (Yes/No)
- If your previous answer has been yes, please indicate which test was performed for the diagnosis (RT-PCR; Antigen test; ELISA (screening antibody); Others (based on symptoms)
- If your previous answer has been yes, please indicate the date of diagnosis
- If you have had the covid-19 infection, please indicate Yes/No for the following clinical outcomes:

Asymptomatic

Fever

Headache

Fatigue

Cough

Dyspnoea (difficult or laboured breathing)

Ageusia (the absence or impairment of the sense of taste)

Anosmia (the loss of the sense of smell, either total or partial)

Diarrhea

Pneumonia

Oxygen therapy

Hospitalization

Full recovery (total absence of symptoms 6 months after the onset of Covid-19)
